# Supplementary figures and images for: Coordination of rapid cholinergic and dopaminergic signaling in striatum during spontaneous movement
Source: eLife journal article supplement (doi:10.7554/elife.44903), 2019-03-28

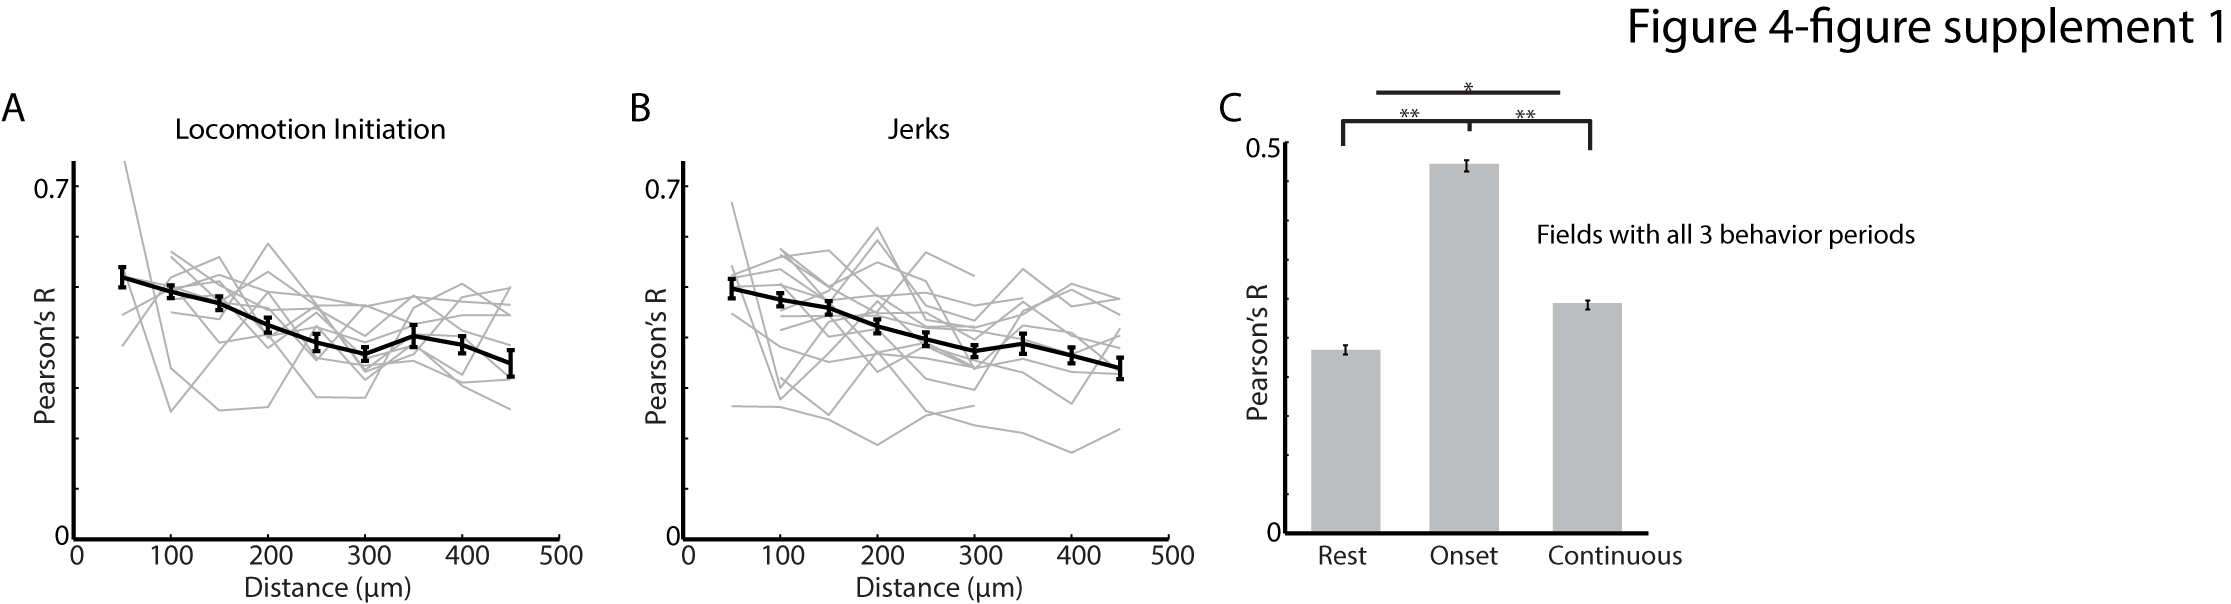

Supplement: supp [file elife-44903-supp-v1.zip › elife_poa_e44903_Figure_4_figure_supplement_1.tif]

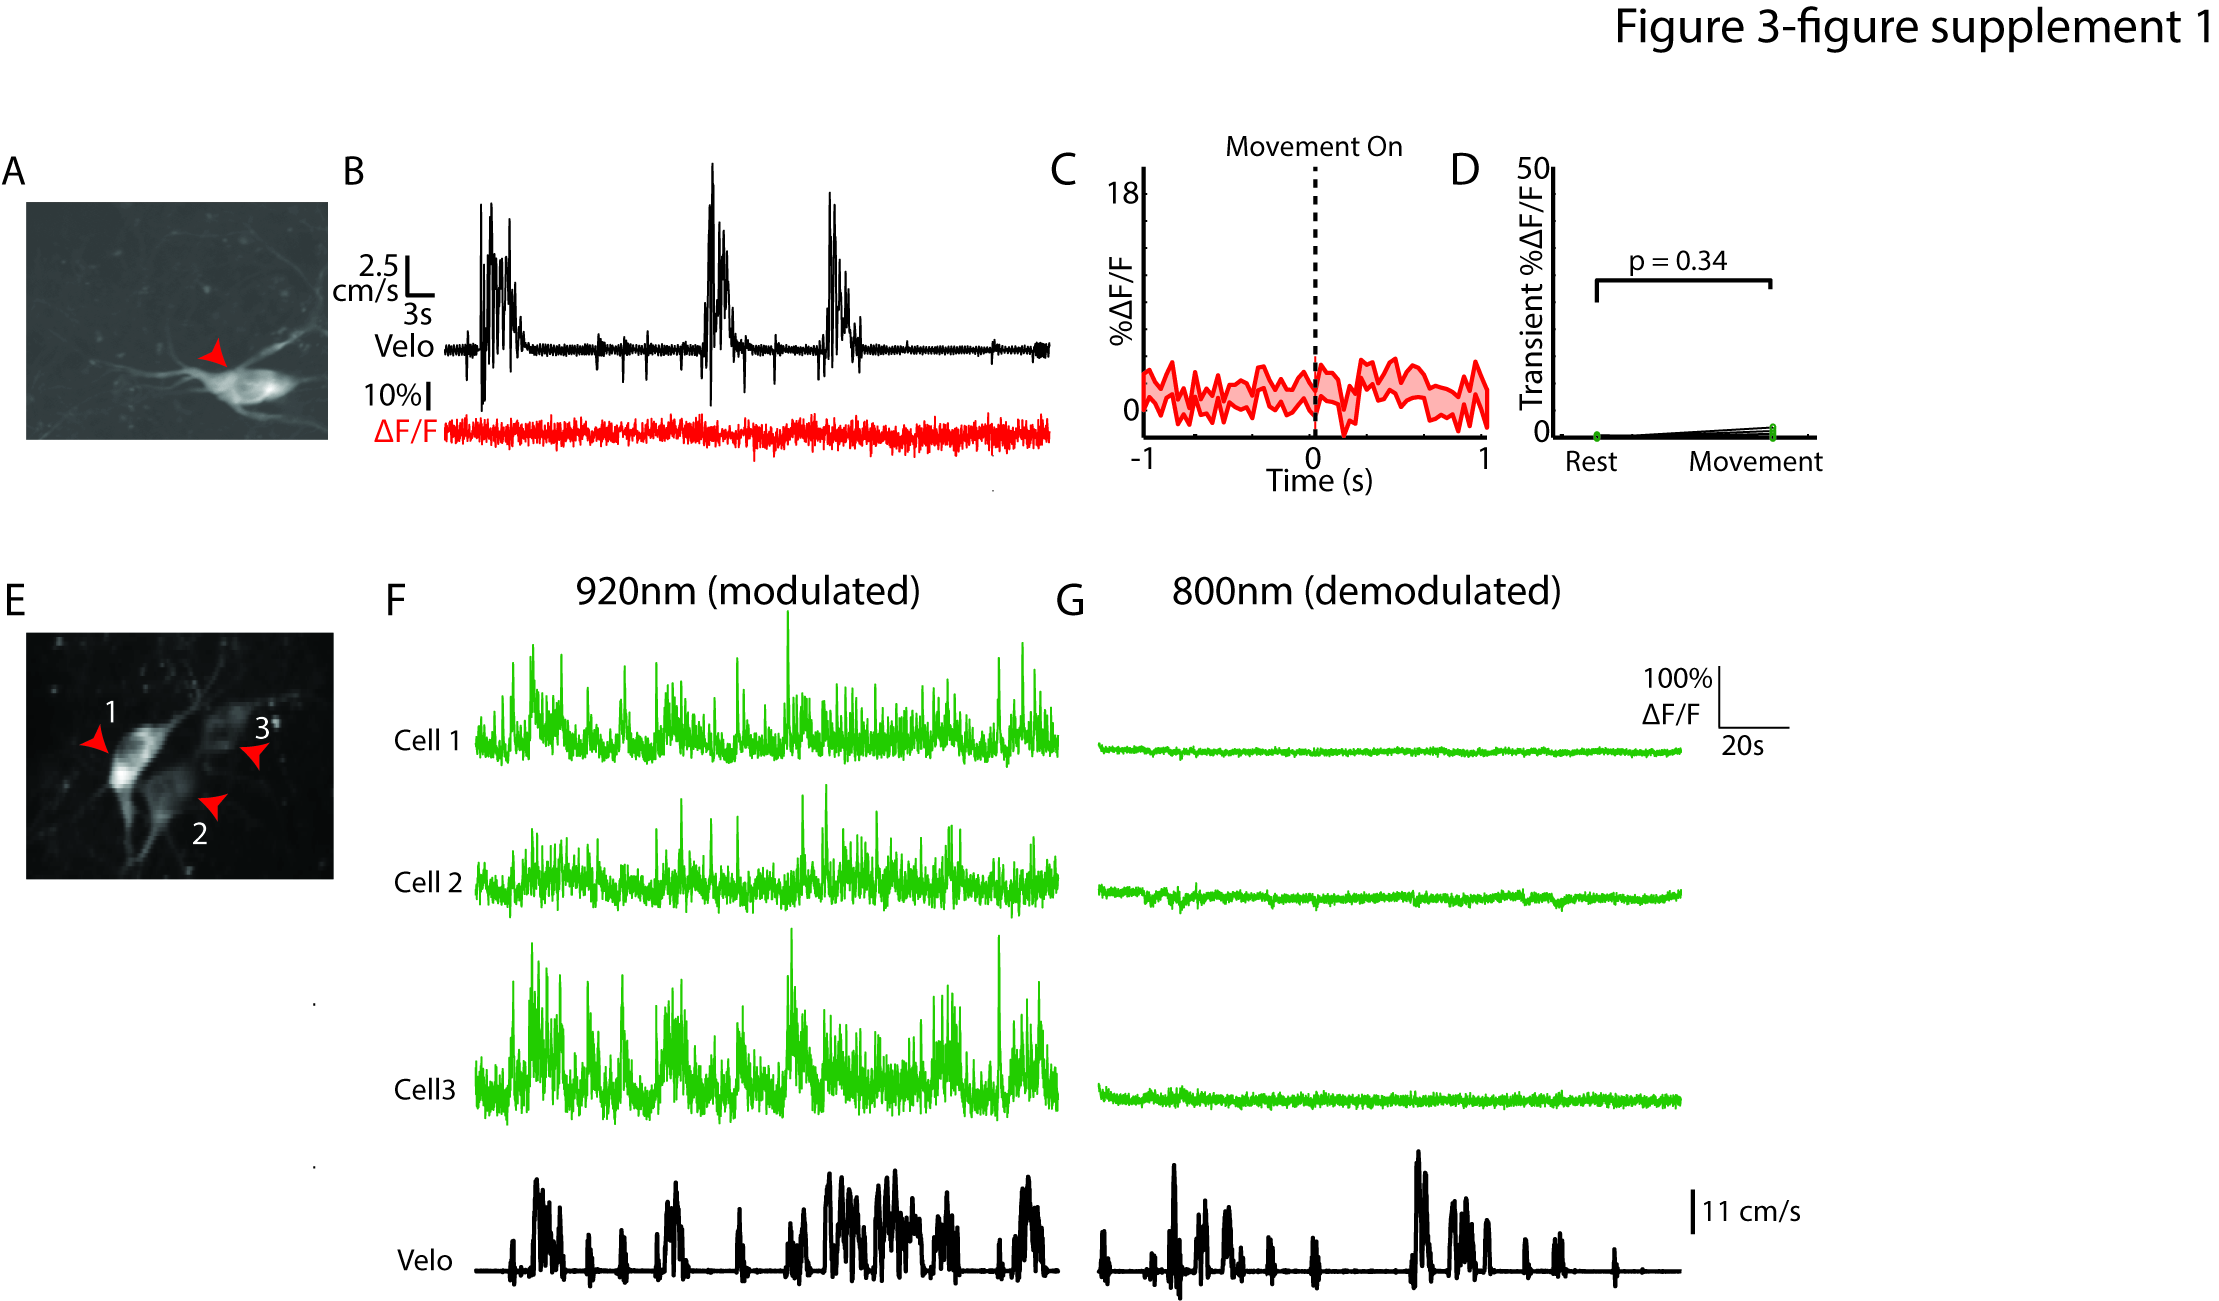

Supplement: supp [file elife-44903-supp-v1.zip › elife_poa_e44903_Figure_3_figure_supplement_1.tif]

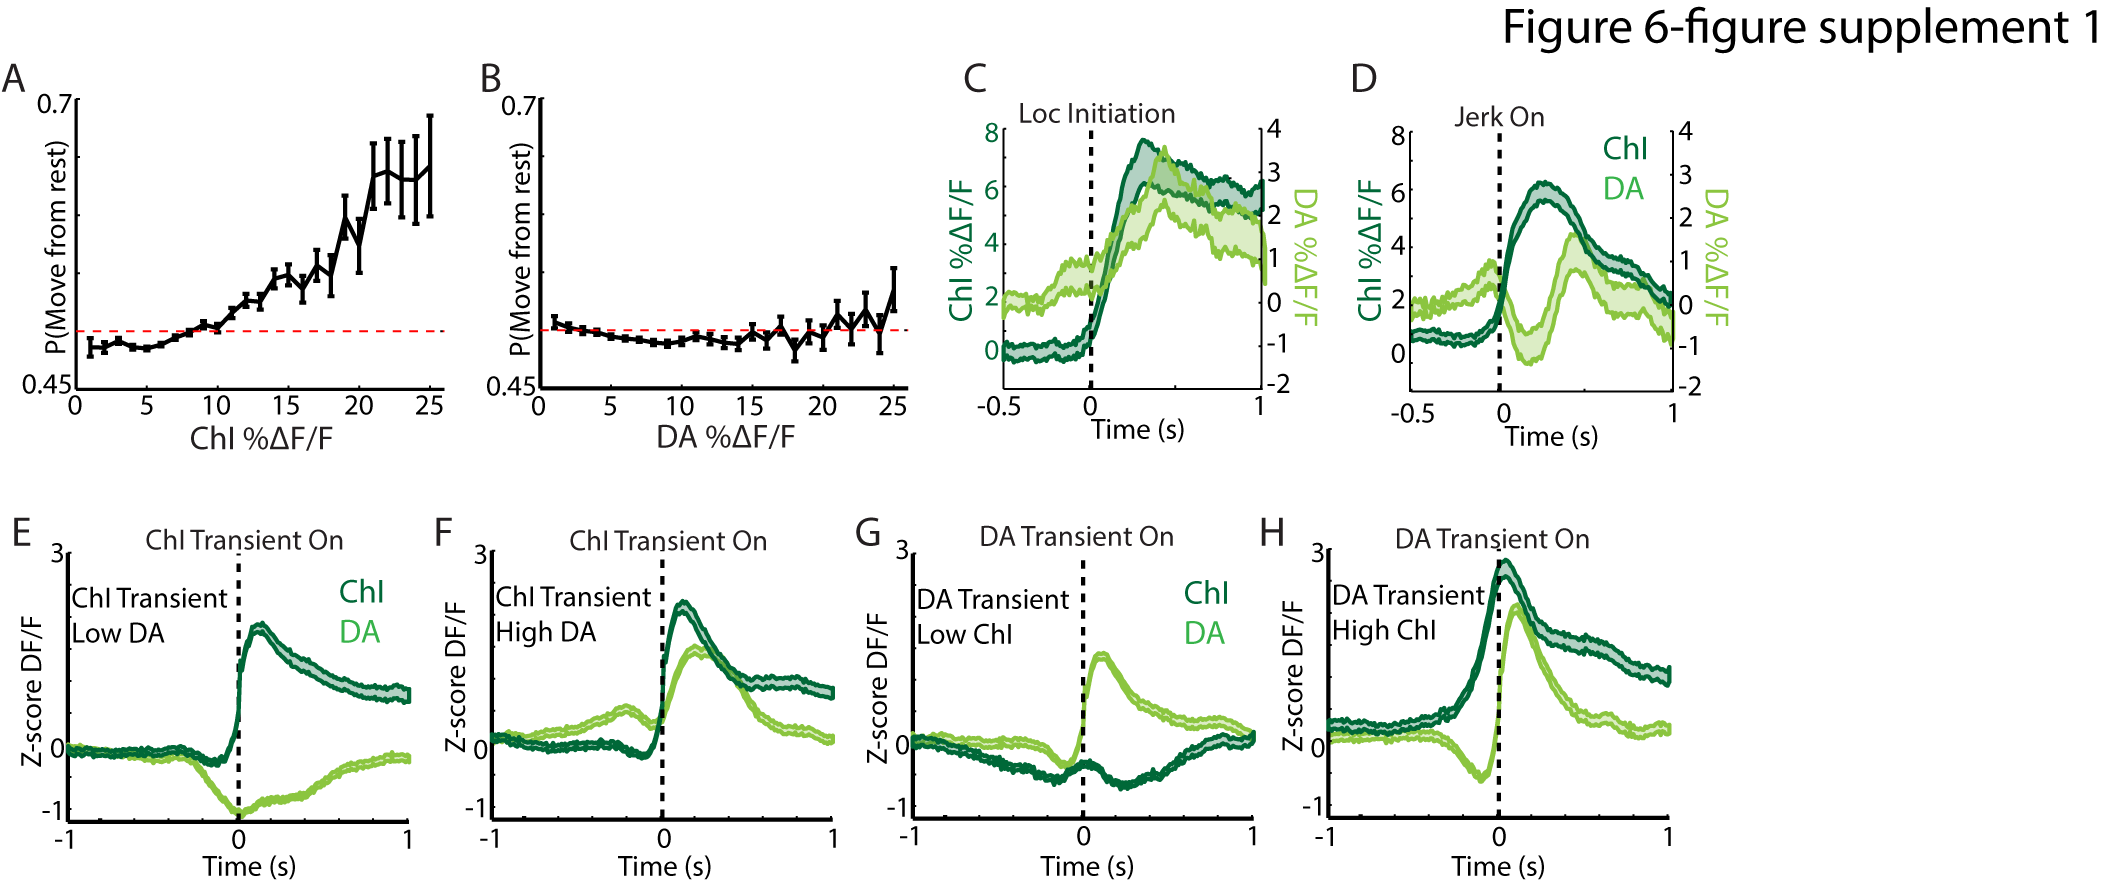

Supplement: supp [file elife-44903-supp-v1.zip › elife_poa_e44903_Figure_6_figure_supplement_1.tif]

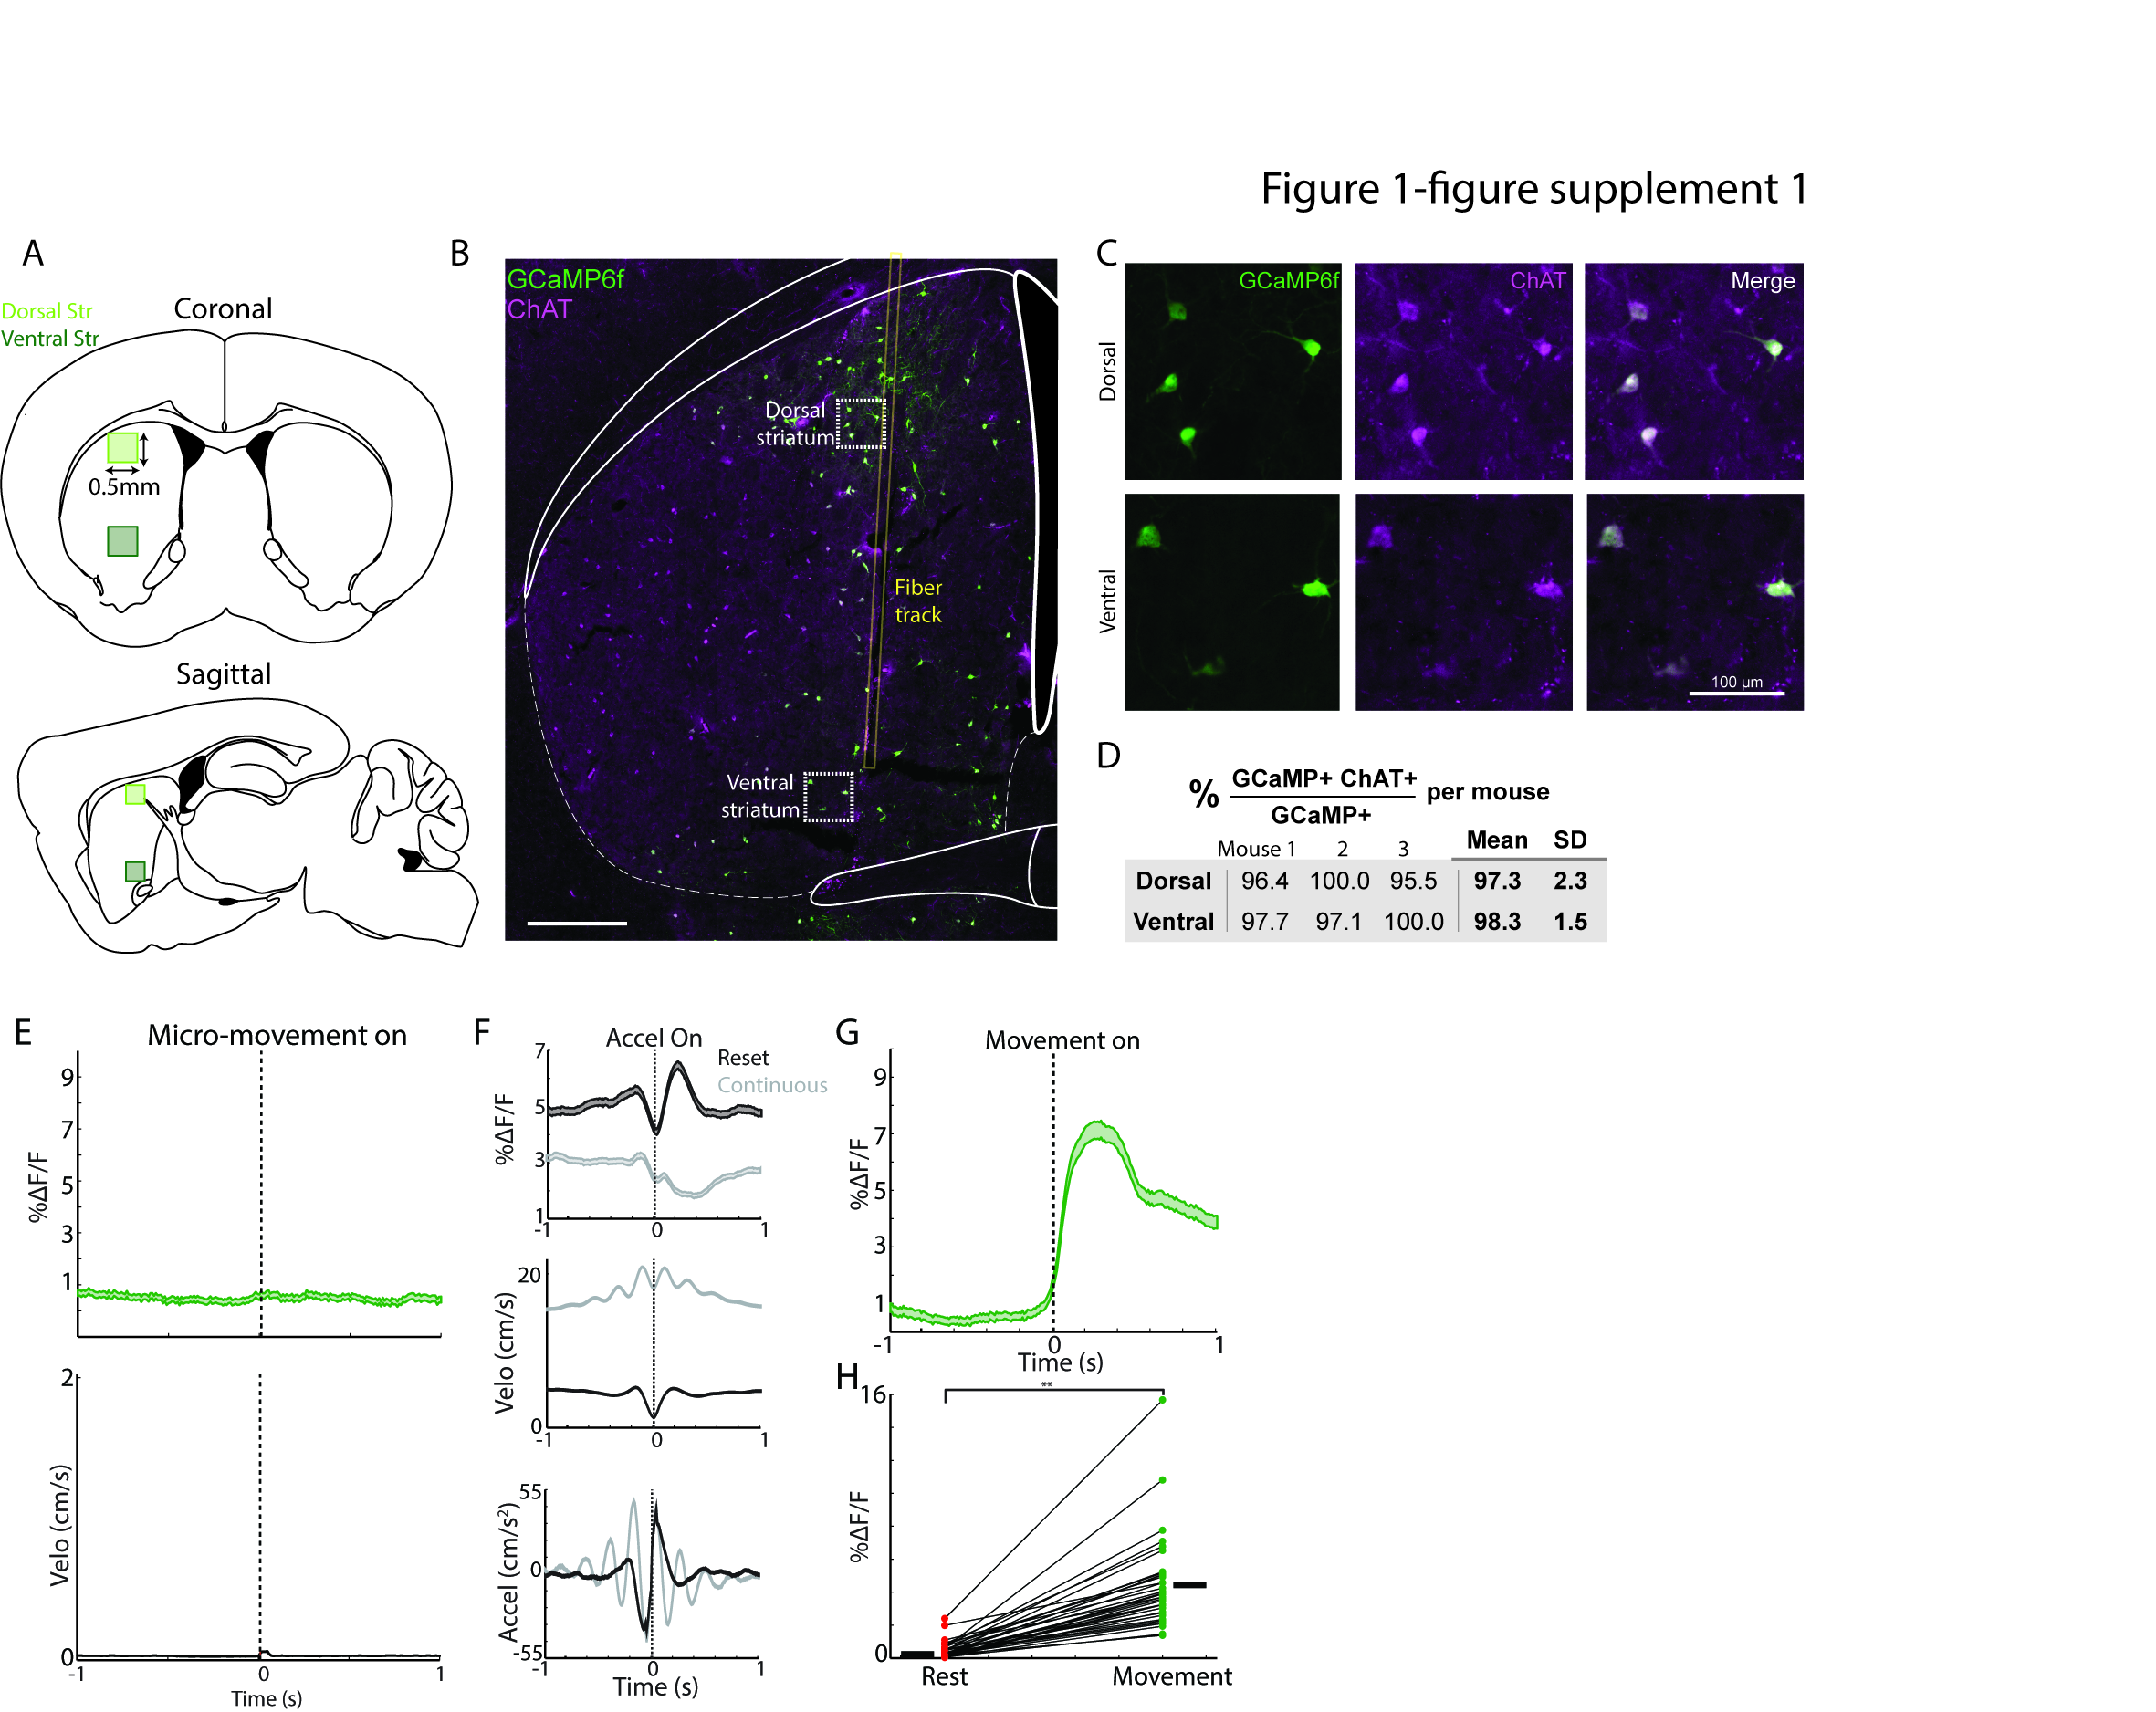

Supplement: supp [file elife-44903-supp-v1.zip › elife_poa_e44903_Figure_1_figure_supplement_1.tif]

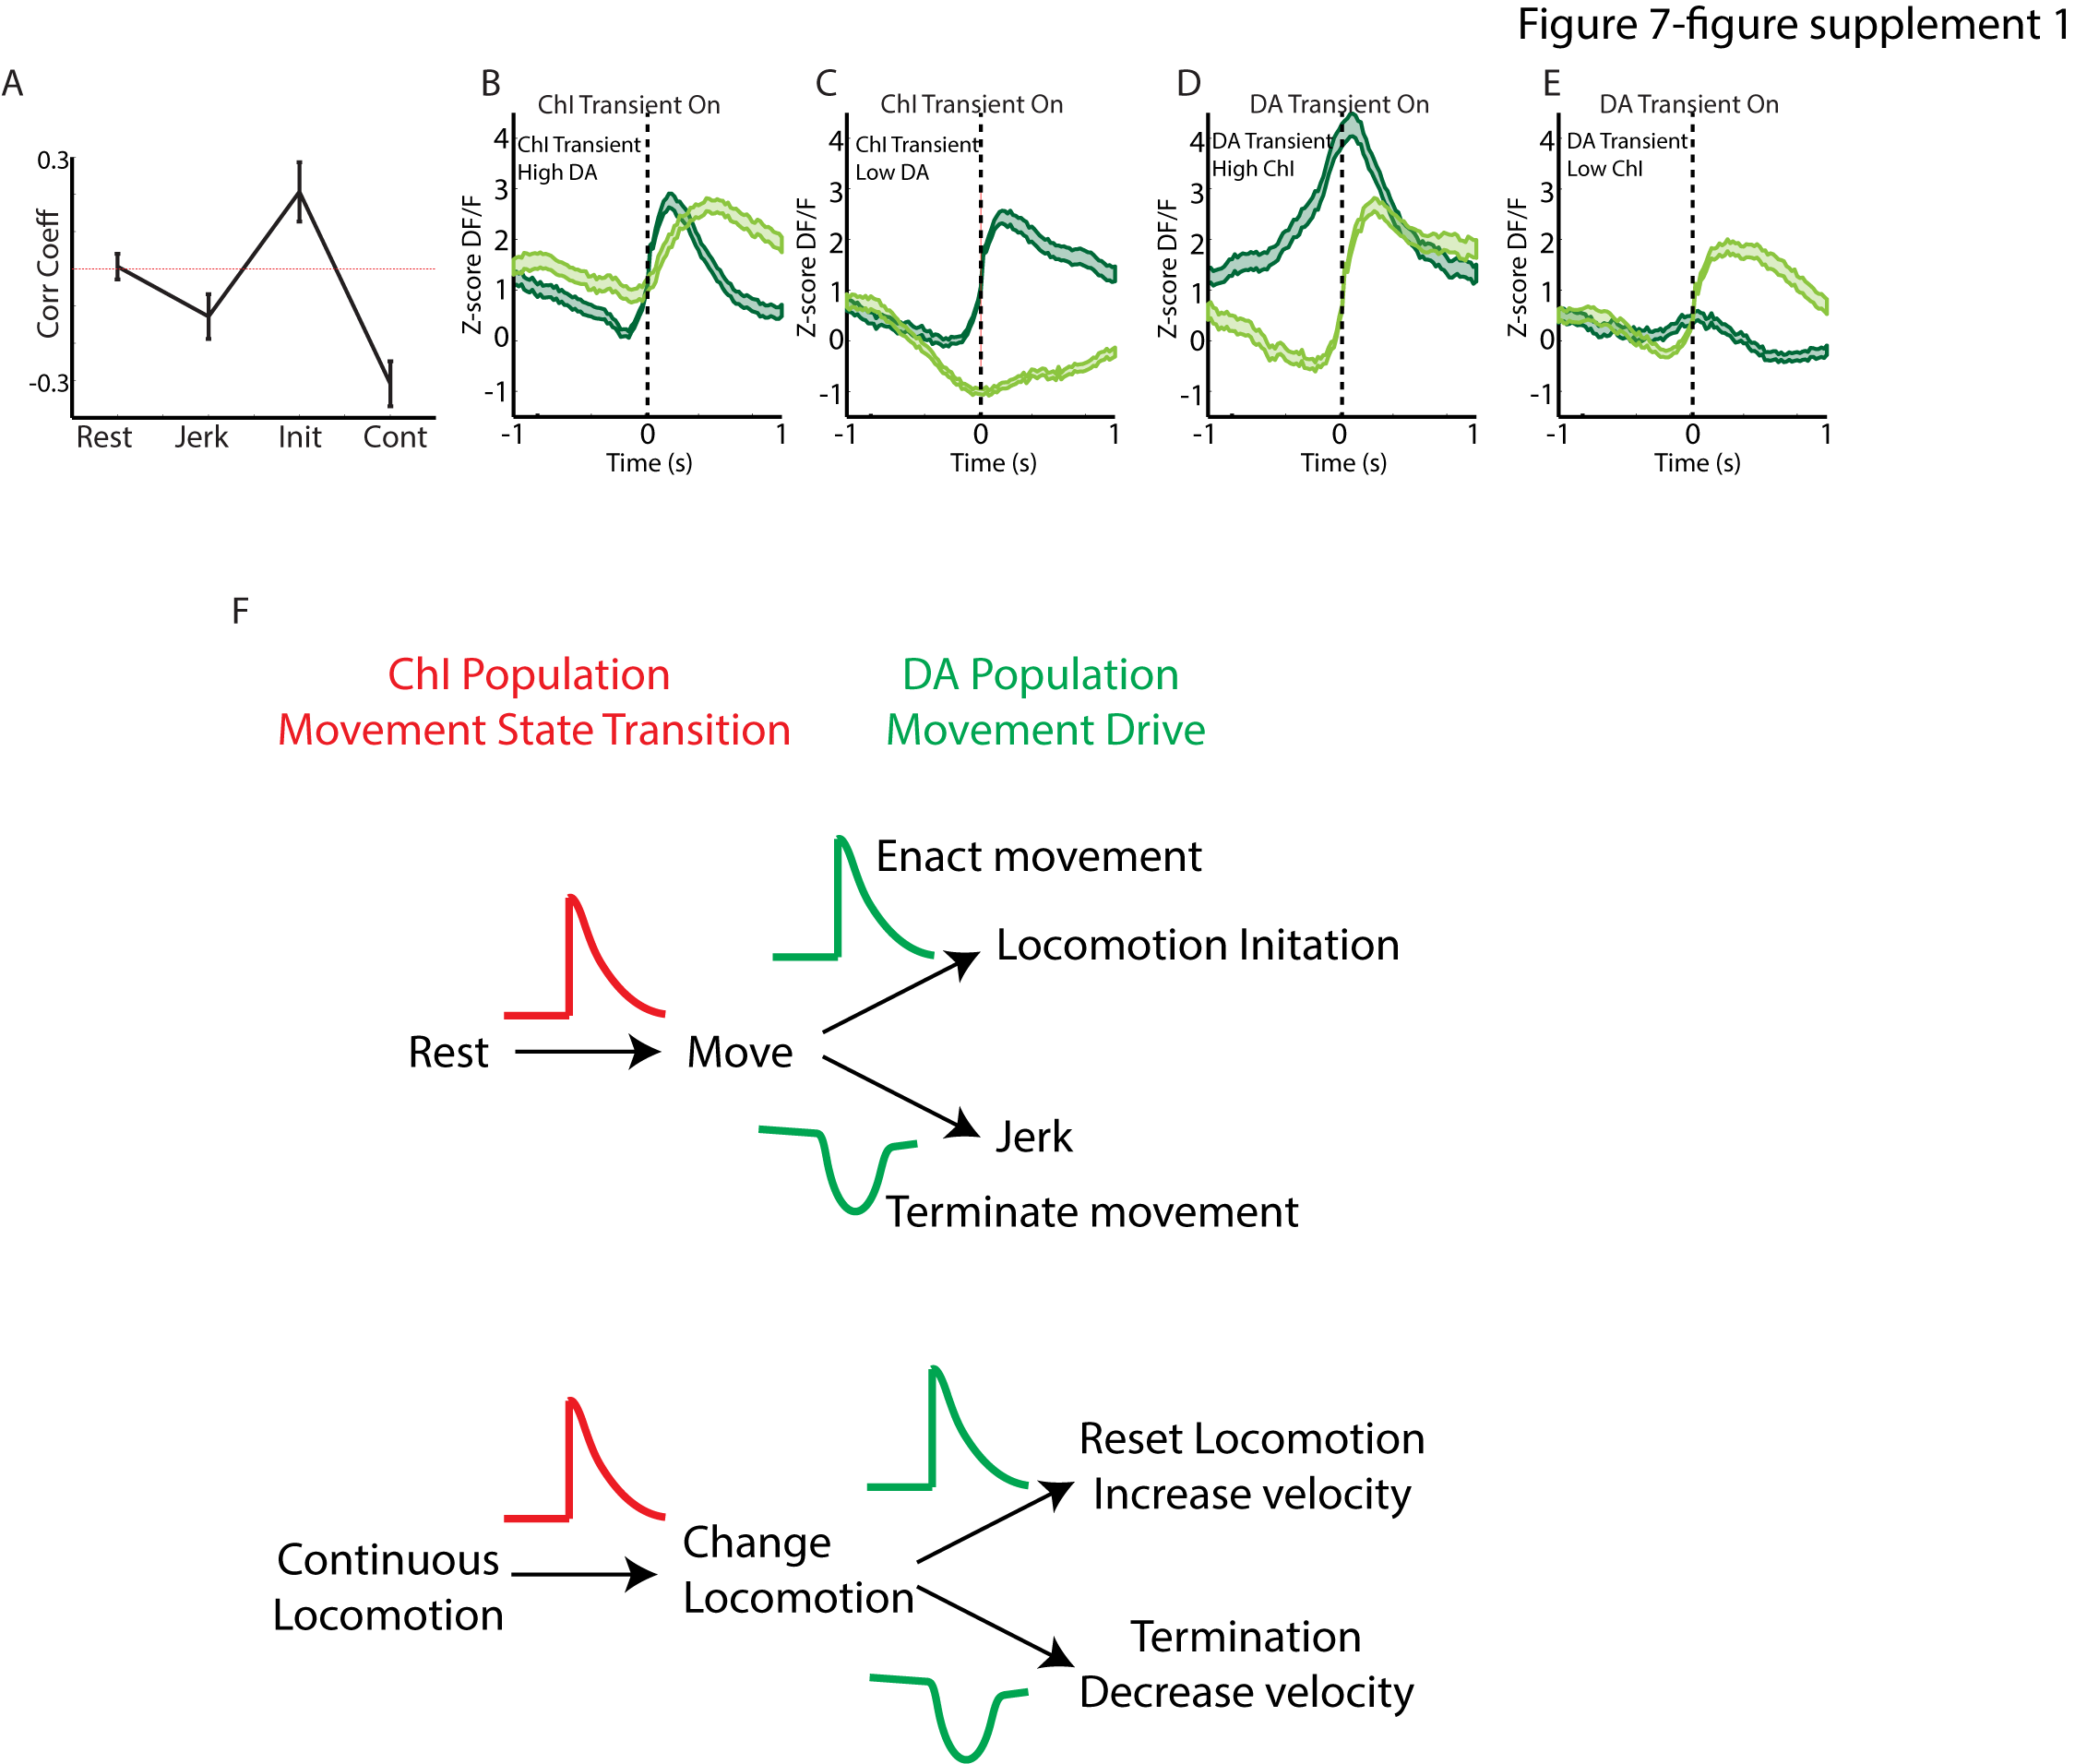

Supplement: supp [file elife-44903-supp-v1.zip › elife_poa_e44903_Figure_7_figure_supplement_1.tif]

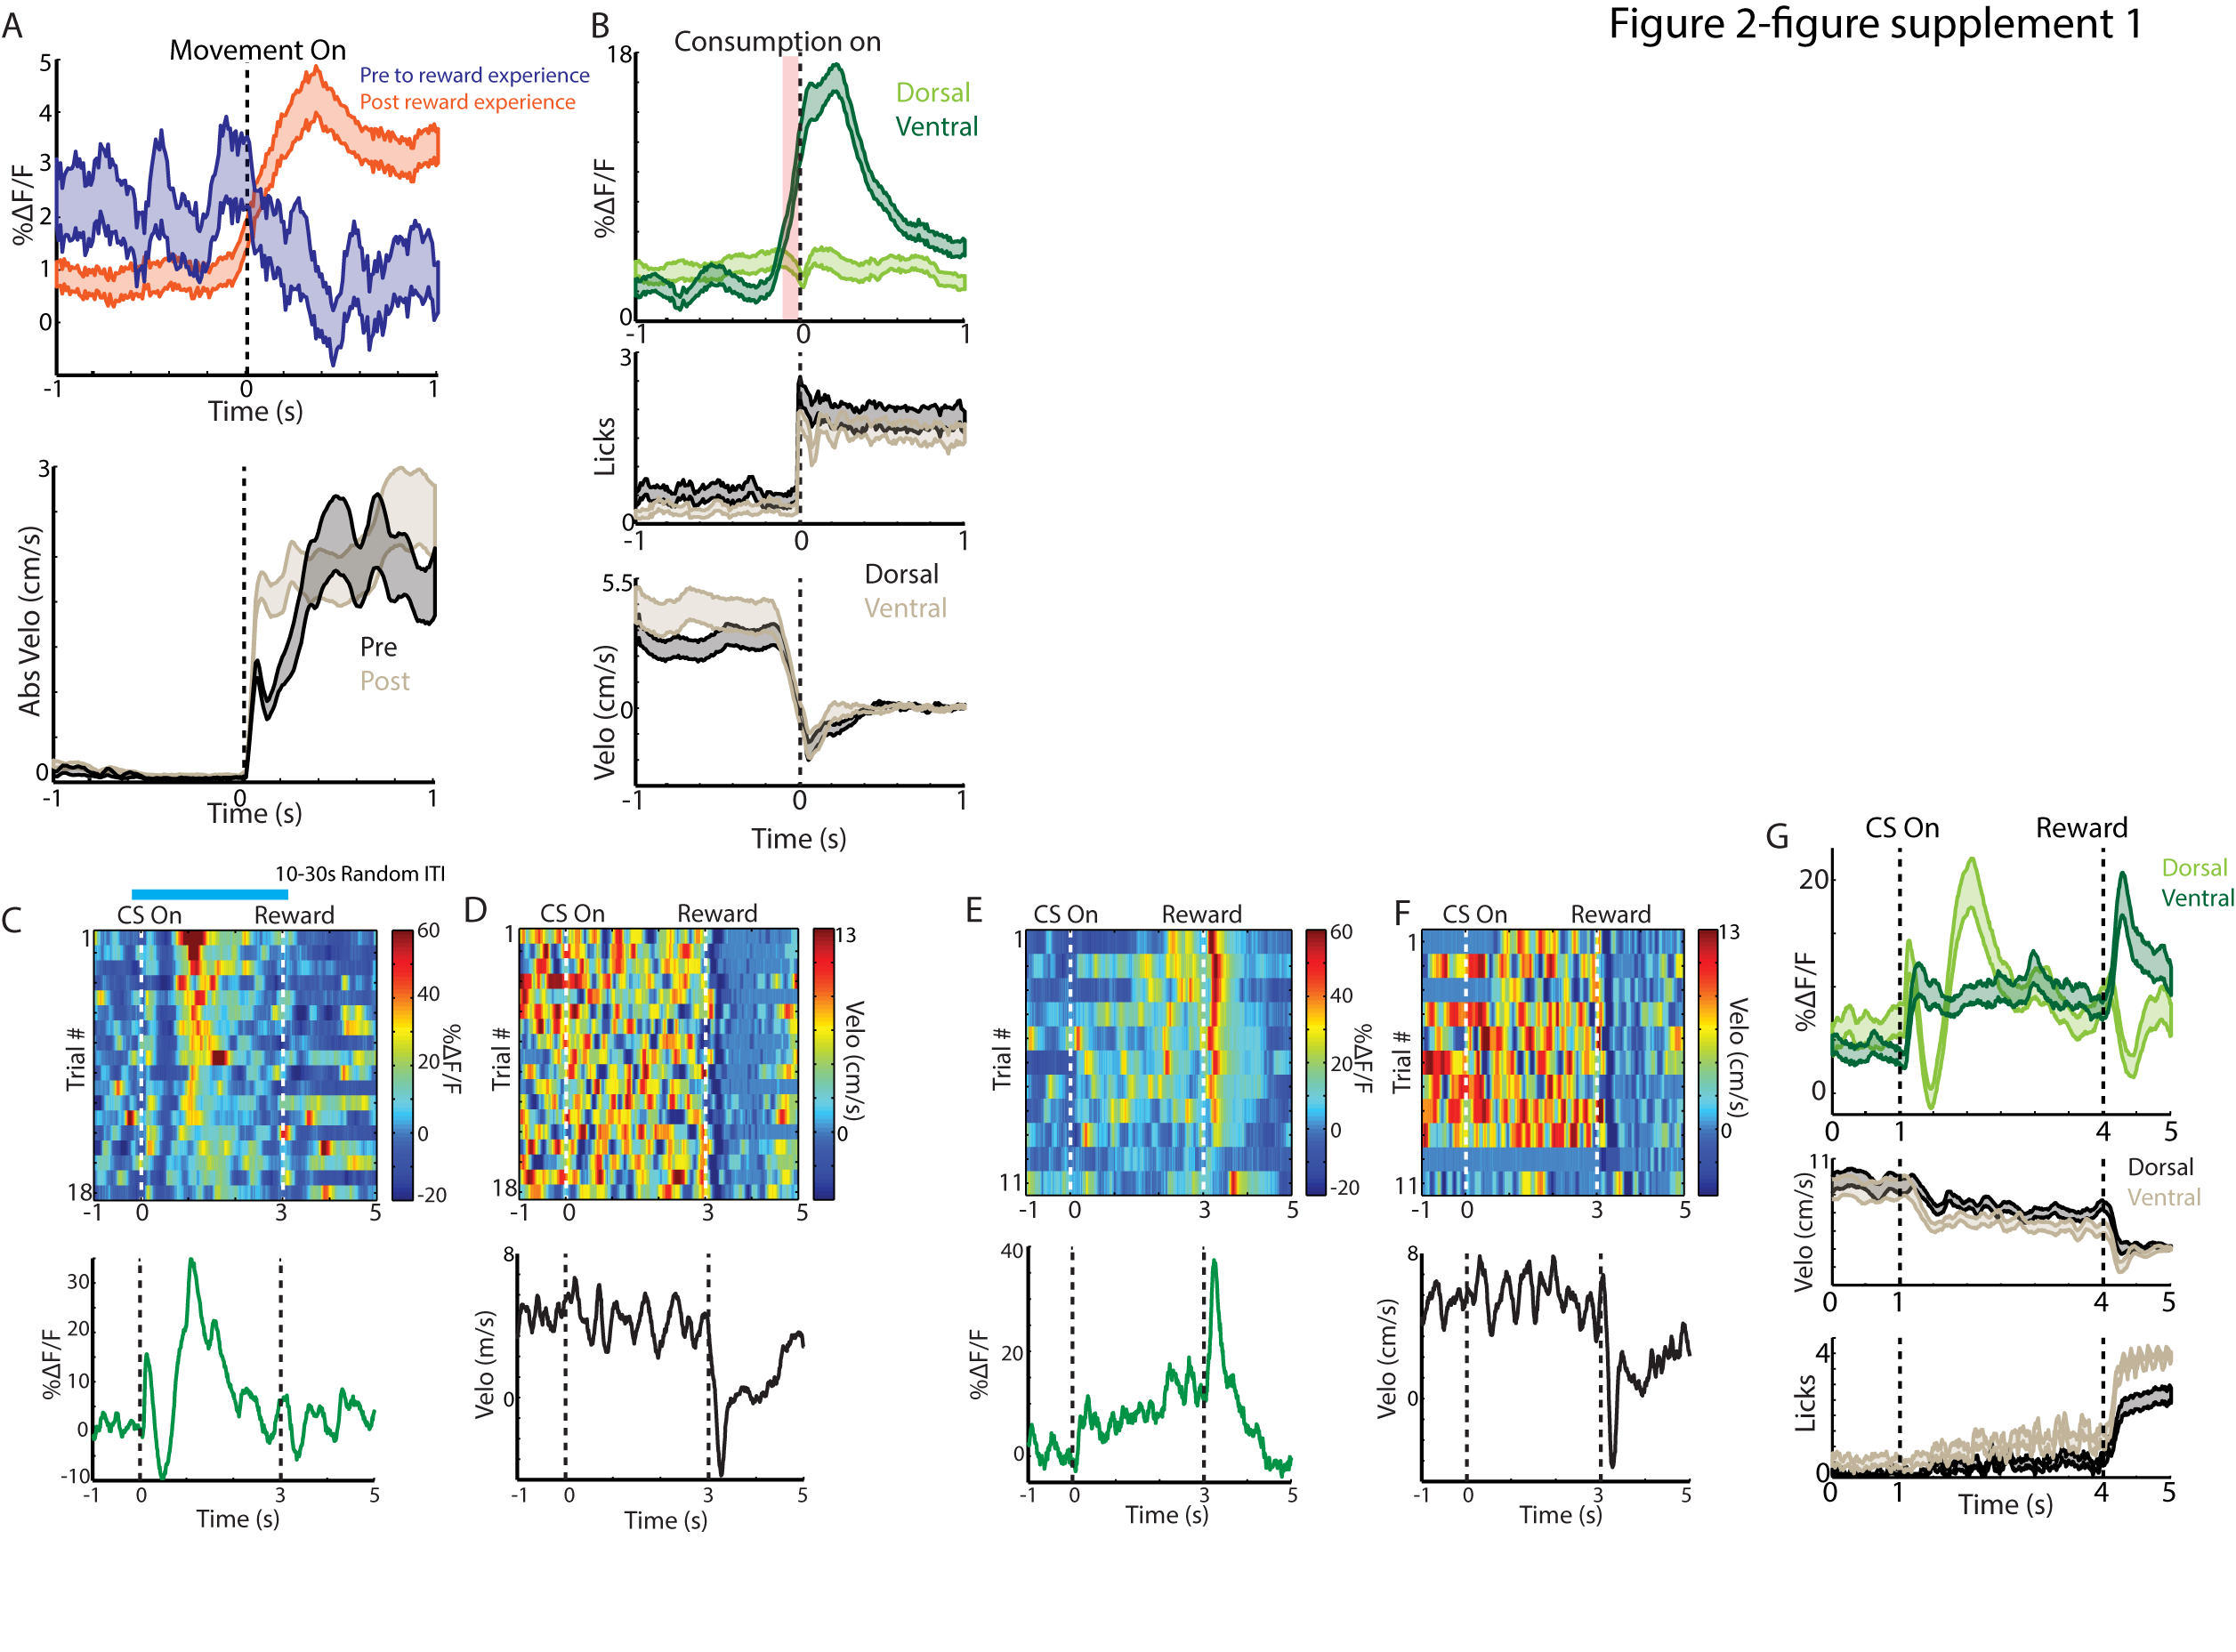

Supplement: supp [file elife-44903-supp-v1.zip › elife_poa_e44903_Figure_2_figure_supplement_1.tif]

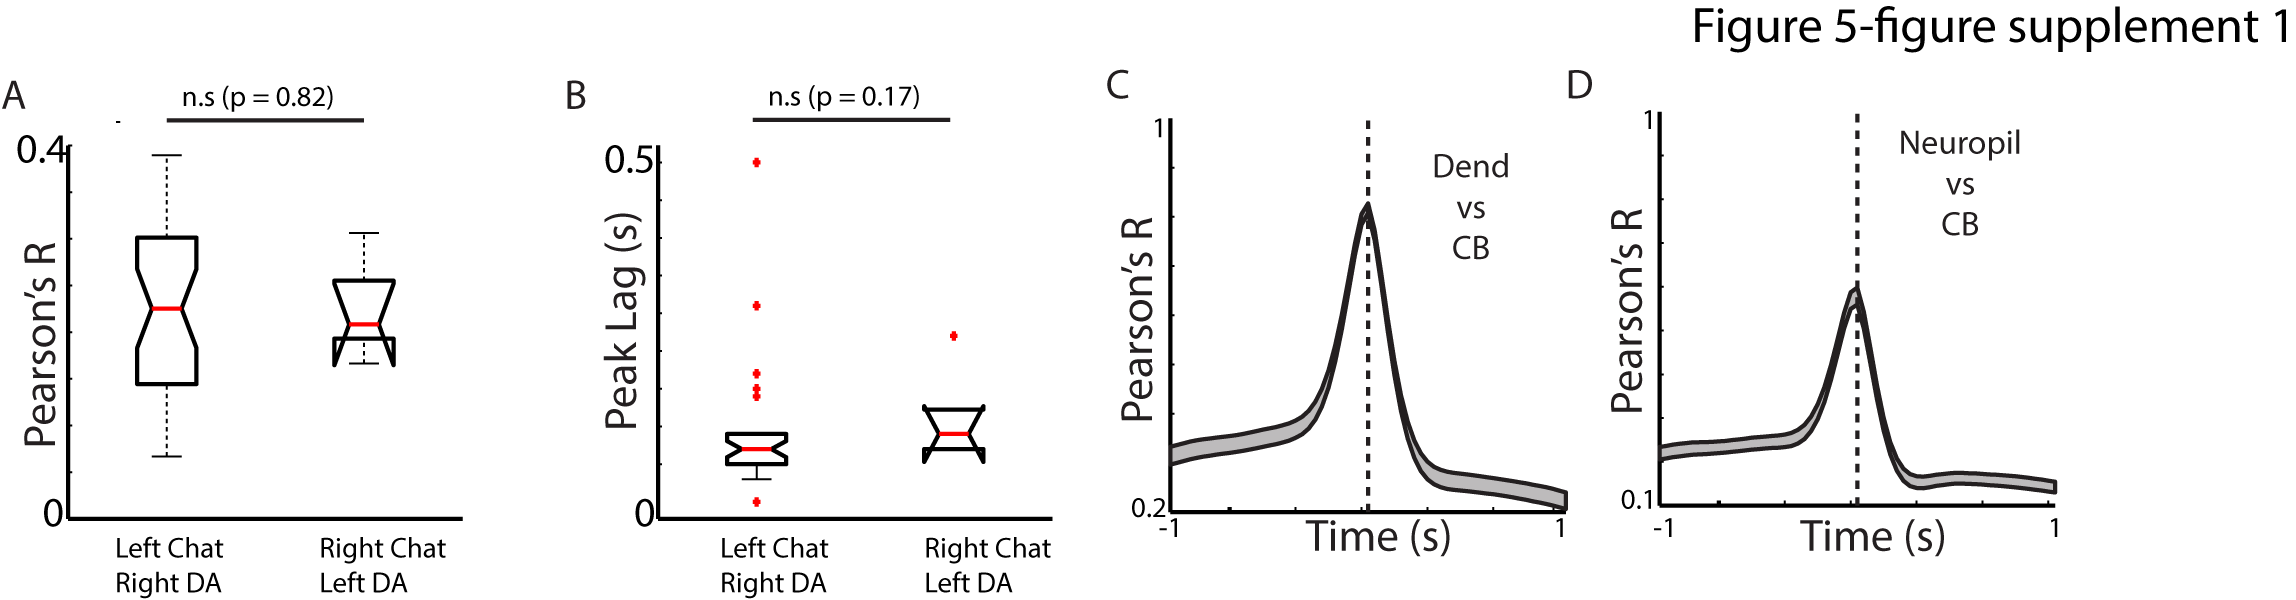

Supplement: supp [file elife-44903-supp-v1.zip › elife_poa_e44903_Figure_5_figure_supplement_1.tif]
